# Supplementary material for: Dissecting the Molecular Basis for Genetic Improvement of Rice
Source: Research Square preprint supplement (doi:10.21203/rs.3.rs-1749870/v1), 2022-06-22
Supplement: Supplementary file 1 [file 4210dd28eb92479364e0545b.xlsx]

## Sheet: Sheet1
Supplementary Table 4 Quality traits of 38 rice varieties
Varieties	Grain length (mm)	Grain width (mm)	Grain Length to width ratio	Brown rice rate (%)	Milled rice rate (%)	Head milled rice rate (%)	Chalkiness area (%)	Chalky grain rate (%)	Transparency	Milled grain length (mm)	Milled grain width (mm)	Milled rice length to width ratio (%)	Amylose content (%)	Gel consistency (mm)	Alkali digestion
MeiB	8.068	2.225	3.63	76.51	55.86	16.52	1.16	7.44	3	4.484	1.67	2.69	23.8	36	3.88889
LongfengB	8.276	2.52	3.28	78.78	65.26	32.1	2.69	9.93	2	5.101	1.891	2.7	11.9	59	4.66667
WantaiB	9.06	2.453	3.69	79.66	64.35	40.44	0.61	2.47	1	5.678	1.917	2.96	13.3	64	2
Fengtian1B	9.05	2.082	4.35	78.58	62.74	44.05	0.83	6.55	1	5.266	1.567	3.36	10.4	78	1.88889
DingxiangB	10.574	2.293	4.61	78.18	67.68	53.81	0.86	6.31	2	6.873	1.776	3.87	12.27	60.5	2.11111
QiuB	8.079	2.213	3.65	78.23	68.52	56.12	4.33	20.04	3	5.064	1.748	2.9	21.3	27.6667	4
YexiangB	8.442	2.171	3.89	80.06	66.87	62.75	0.04	0.36	1	5.105	1.679	3.04	16.72	54.6667	6.83333
BoB	7.675	2.852	2.69	79.22	67.65	52.21	2.41	10.3	3	4.966	2.242	2.21	21.1	33.3333	3.38889
TeB	8.103	3.306	2.45	81.13	67.78	61.55	31.88	86.78	4	5.338	2.494	2.14	24.71	30.6667	4.05556
Gui1025	7.952	2.181	3.65	77.65	66.42	43.98	0.5	2.86	1	5.241	1.76	2.98	14.9	43.6667	5.44444
Gui796	9.06	2.71	3.34	78.74	66.29	33.7	4.69	16.18	1	5.938	2.185	2.72	25.26	37	6.72222
Guanghui998	8.489	2.451	3.46	80.04	66.83	53	0.9	4.47	2	5.448	1.952	2.79	14.9	81	1.72222
Gui139	8.94	2.512	3.56	79.65	67.79	20.48	2.04	8.93	1	6.181	1.956	3.16	16.69	28	6.83333
Gui169	8.911	2.472	3.6	79.36	65.61	55.57	1.62	4.31	1	5.622	1.946	2.89	11.9	89	2.44444
Fuhui838-1	8.864	2.49	3.56	79.79	68.04	58.58	0.39	1.16	1	5.848	1.977	2.96	13.9	80	6
Gui826	10.131	2.53	4	81.45	67.35	46.82	0.29	1.31	2	6.569	1.96	3.35	14.4	99	1.66667
Gui9115	8.256	2.078	3.97	80.22	68.32	57.86	0.22	1.29	1	5.583	1.607	3.47	13.18	86.6667	5.38889
GUI3158	8.667	2.273	3.81	79.95	67.27	56.29	0.77	3.21	1	5.569	1.814	3.07	18.7	92	4.77778
Gui682	9.576	2.458	3.9	78.8	66.64	54.13	0.98	4.01	2	5.876	1.865	3.15	16.6	72.3333	1.5
Meizhan	9.063	2.55	3.55	80.88	67.49	49.69	4.35	17.29	2	5.825	2.022	2.88	16.6	94	2
Guihui051	10.094	2.2	4.59	77.74	60.66	45.46	1.96	9.85	4	6.237	1.667	3.74	15.2	50.6667	2.16667
Guihui089	8.64	2.51	3.44	76.81	61.89	51.74	1.73	6.13	2	5.417	1.94	2.79	14.9	44	1.72222
Guihui553	8.515	2.477	3.44	75.02	58.78	52.54	0.45	3.06	2	5.087	1.878	2.71	12.4	54	1.72222
Guihui663	8.99	2.532	3.55	54.96	45.45	33.41	0.82	2.66	1	5.8	2.029	2.86	14.9	88	5.27778
Yuehui9802	8.352	2.555	3.27	77.89	58.11	43.2	25.75	60.96	4	5.002	1.97	2.54	14.6	95	2.83333
Gui117	10.156	2.101	4.83	76.36	62.85	59.53	0.09	0.63	1	6.383	1.602	3.98	14.85	72.5	6.94444
Gui263	9.631	2.502	3.85	78.26	66.37	61.1	2.37	7.65	2	5.889	2.02	2.92	16.07	68.6667	5.11111
Gui289	8.574	2.295	3.74	78.07	65.53	55.8	0.84	4.91	2	5.47	1.775	3.08	13.7	80	1.77778
Gui516	8.31	2.261	3.68	79.62	65.66	55.62	0.17	1.37	2	5.346	1.776	3.01	12.65	98.6667	2
Gui569	9.468	2.151	4.4	78.06	65.25	60.31	0.28	1.96	1	6.292	1.629	3.86	13.3	76.5	5.83333
Gui721	9.816	2.144	4.58	78	68	60.75	0.63	5.38	2	6.663	1.662	4.01	14.31	86	5.11111
Gui726	9.933	2.27	4.38	76.39	65.3	55.09	0.64	4.25	1	6.474	1.738	3.72	14.6	79.6667	4.88889
Gui99	9.275	2.454	3.78	80.07	69.3	66.17	0.58	1.75	1	6.011	1.932	3.11	16.37	95	5.5
Zhenshan97	7.706	3.292	2.34	80.73	68.57	53.02	21.74	63.39	3	5.098	2.56	1.99	22	30	2.61111
RYousi	9.603	2.048	4.69	77.24	67.7	56.39	0.66	3.93	1	6.738	1.536	4.39	16.3	40.6667	4.83333
RSimiao	9.935	2.098	4.74	77.05	67.23	57.58	0.13	1.05	1	6.882	1.579	4.36	15.5	70	4.66667
RBasi	9.802	2.071	4.73	77.61	69.22	60.75	0.31	2.26	1	6.85	1.576	4.35	19.7	47.6667	5.11111
RLisi	9.899	2.091	4.73	80.45	71.42	65.93	0.6	3.22	1	6.878	1.53	4.5	15.2	49	3.38889
